# Supplementary material
Source: publisher site journal article supplement (https://www.spandidos-publications.com/3545/downloadSupplementary)

Figure S1. Overexpression of miR-140-5p affects cell viability, apoptosis and apoptosis-related protein expression in CML cells. K562 and KCL22 cells were transfected with miR-140-5p mimic or mimic-NC. (A) The transfection efficiency was confirmed by reverse transcription-quantitative PCR. (B) CCK-8 assay was performed to assess cell viability. (C) Apoptosis was measured by flow cytometry. (D) The protein expression levels of Bcl-2, Bax, pro-caspase-3 and cleaved caspase-3 were determined by western blot analysis. Results for Bcl-2 and Bax were plotted as fold-ratios relative to  $\beta$ -actin. Results for cleaved caspase-3 were plotted as fold-ratios relative to pro-caspase-3. \*\*\* $P$ <0.001 vs. mimic-NC. CML, chronic myeloid leukemia; NC, negative control; OD, optical density.

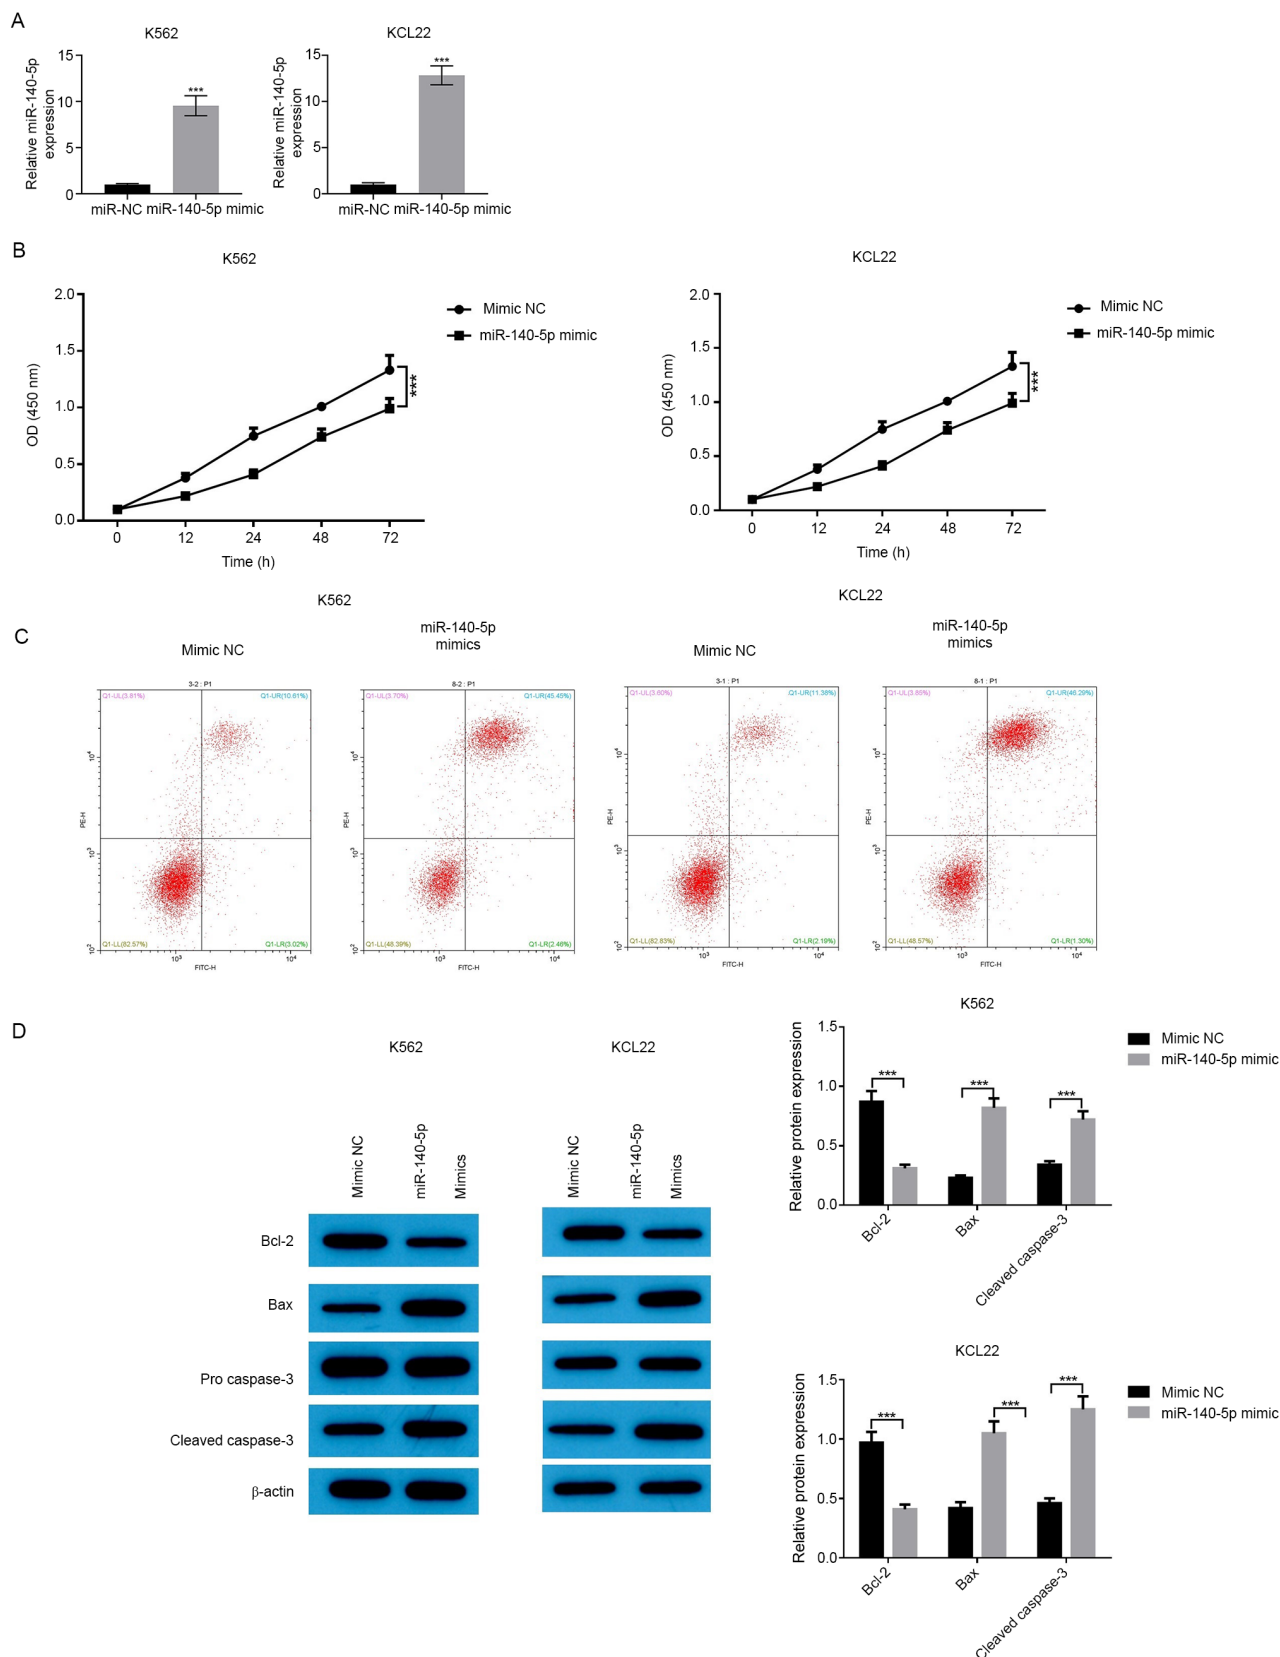

Supplement: Supplementary file 1 [file downloadSupplementary]
